# Supplementary material for: A Framework for Multivariate Analysis of Land Surface Dynamics and Driving Variables—A Case Study for Indo-Gangetic River Basins
Source: MDPI journal article supplement (doi:10.3390/rs14010197), 2022-01-02
Supplement: s1 [file s1]

**Supplementary material for:**

**“A Framework for Multivariate Analysis of Land Surface Dynamics and Driving Variables - A Case Study for Indo-Gangetic River Basins”**

by Soner Ureyen<sup>1</sup>, Felix Bachofer<sup>1</sup> and Claudia Kuenzer<sup>1,2</sup>

<sup>1</sup> German Remote Sensing Data Center (DFD), German Aerospace Center (DLR), Wessling, Germany

<sup>2</sup> Department of Remote Sensing, Institute of Geography and Geology, University Wuerzburg, Wuerzburg, Germany

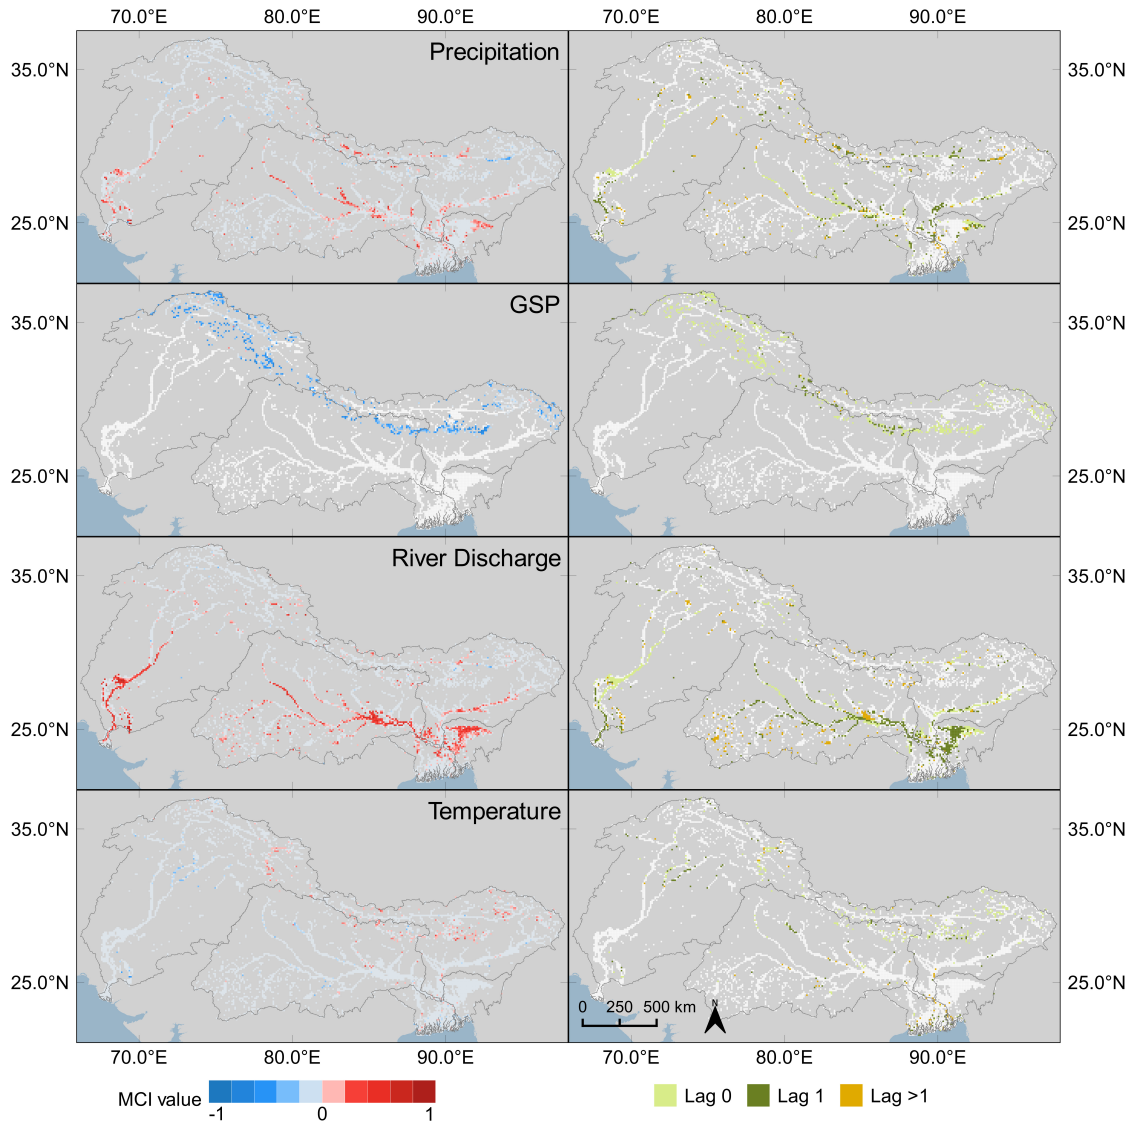

Fig. S1. Target variable: DLR Global WaterPack. Computed influence of driving variables on target variable by using PCMCI. Maximum MCI value for considered temporal lags is extracted and visualized on the left. The corresponding temporal lag (month) is illustrated on the right.

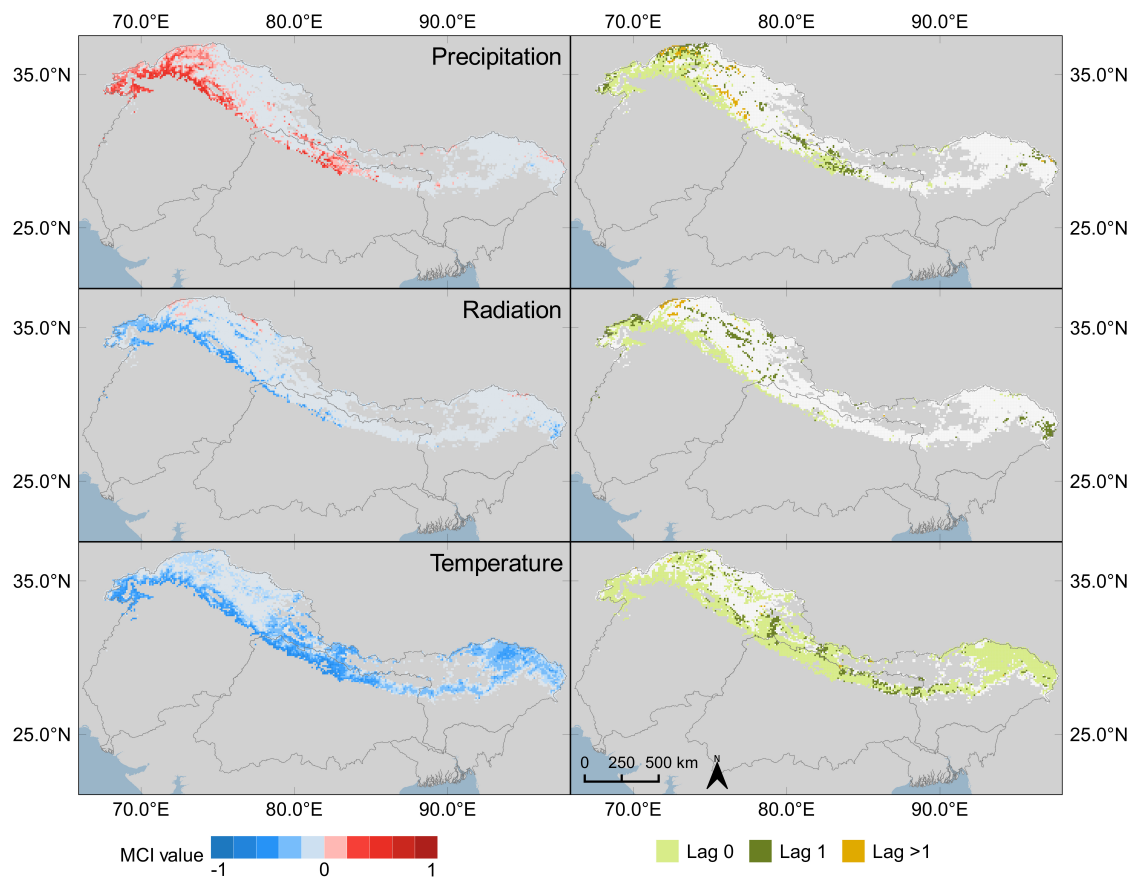

Fig. S1 (cont.). Target variable: DLR Global SnowPack.

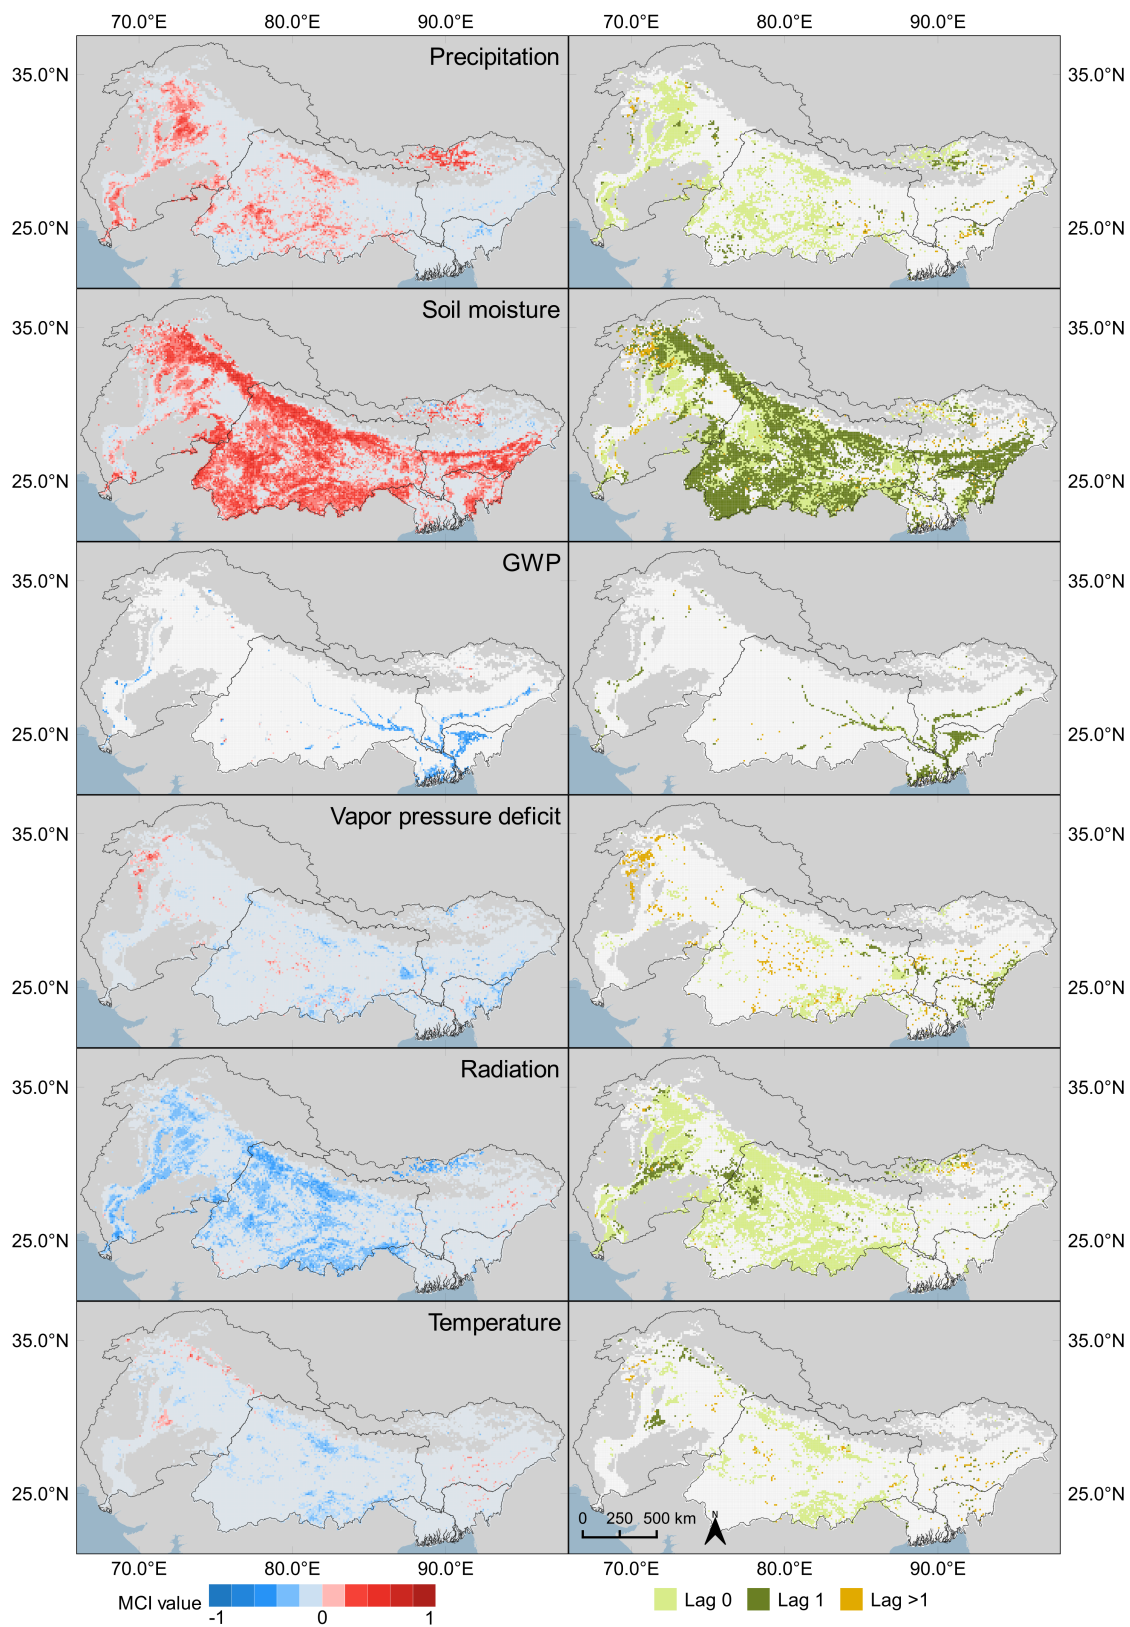

Fig. S1 (cont.). Target variable: MODIS NDVI.
