# Supplementary material for: A Framework for Multivariate Analysis of Land Surface Dynamics and Driving Variables—A Case Study for Indo-Gangetic River Basins
Source: MDPI journal article supplement (doi:10.3390/rs14010197), 2022-01-02
Supplement: s1 [file s1]

Archive with 1 entries (1 files):
- remotesensing-1494350-supplementary.pdf
